# Supplementary material
Source: Elsevier journal article supplement (https://www.sciencedirect.com/science/article/pii/S2173572719300839)
Supplement: mmc1 [file S2173572719300839:mmc1.pdf]

## Anexo 1

### Detalle del procedimiento para las mediciones de Pico flujo espiratorio tosido y Presión espiratoria máxima:

Para las mediciones se posicionó al paciente en sedestación en cama a 45°. Para la medición del **Pico flujo espiratorio tosido (PFET)** se colocó el sensor de pico flujo espiratorio de tipo mecánico (diferentes marcas según el centro de investigación) a continuación de una máscara oro-nasal, luego se procedió al desinflado del balón de neumotaponamiento y, por último, se procedió a la oclusión de la cánula de traqueostomía. Luego se solicitó al paciente mediante un estímulo verbal para que realice una tos a capacidad pulmonar total. En el caso en que el paciente no pudiese realizar la maniobra se le indujo mediante la estimulación mecánica de la misma, a través de la compresión de la cánula de traqueostomía. Se realizaron 3 mediciones con un descanso de 5 minutos entre ellas. Se consideró el mejor valor de las mediciones.(1)

Para la medición de **Presión espiratoria máxima (PE<sub>máx</sub>)**, se utilizó un tubo en forma de “T” con un extremo conectado en el extremo proximal (conector de 15 mm) de la traqueostomía con el balón de neumotaponamiento sobrerinflado, (2) en la segunda rama un manómetro aneroide (diferentes marcas según centro de investigación) y en el tercer orificio se coloca una válvula unidireccional que solo permite la inspiración y se ocluye durante la espiración llevando al paciente a capacidad pulmonar total durante, al menos 25 segundos, aunque si el paciente lo tolera se llegó a 60 segundos. (3)(4) Se realizaron 3 mediciones con un descanso de 5 minutos entre ellas. Se consideró el mejor valor de las mediciones.

1. Bach JR, Saporito LR. Criteria for Extubation and Tracheostomy Tube Removal for Patients With Ventilatory Failure: A Different Approach to Weaning. *Chest*. 1996;110(6):1566–71.
2. Guimarães F, Alves F, Constantino S, Dias C, Menezes S. Assessment of Maximum Inspiratory pressure in Non-cooperative Critical Patients: Comparison Between Two Methods. *Rev Bras Fisioter*. 2007;11(3):203–7.
3. Caruso P, Friedrich C, Denari SDC. The Unidirectional Valve Is the Best Method To Determine Maximal Inspiratory Pressure During Weaning \*. *Chest*. 1999;115(4):1096–101.
4. de Souza, Leonardo Cordeiro da Silva C, Lugon JR. Evaluation of the Inspiratory Pressure Using a Digital Vacuumeter in Mechanically Ventilated Patients : Analysis of the Time to Achieve the Inspiratory Peak. *Respir Care*. 2012;57(2):257–62.
